# Supplementary material for: Advanced Synthesis of Conductive Polyaniline Using Laccase as Biocatalyst
Source: PLOS journal article supplement (doi:10.1371/journal.pone.0164958), 2016-10-14
Supplement: S2 (10.1371/journal.pone.0164958.s002) [file journal.pone.0164958.s002]

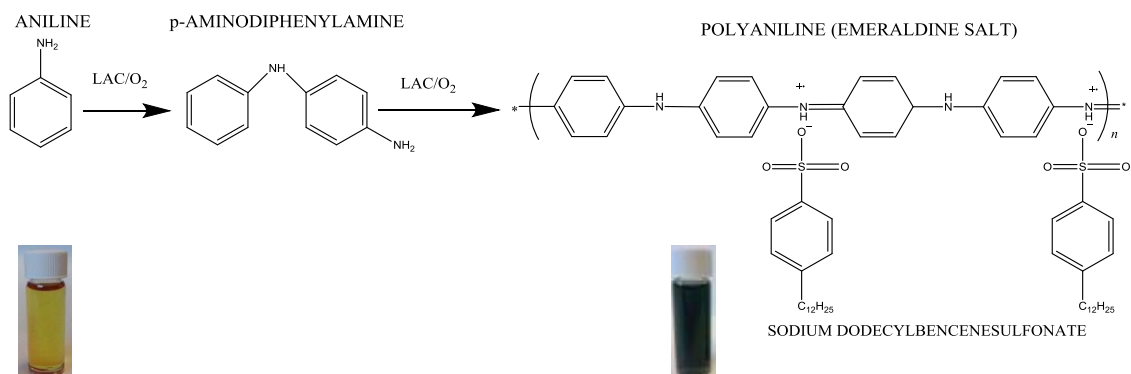

**S2 Fig.** Scheme of the synthesis of polyaniline catalyzed by laccase in the presence of SDBS
